# Supplementary material
Source: PubMed Central journal article supplement (PMC2679459)
Supplement: M900248200_1.pdf [file M900248200_1.pdf]

## SUPPLEMENTAL FIGURE LEGENDS:

**Supplemental Figure S1: *Effect of TZD and TRAIL treatment on Huh-7 cell apoptosis:*** (A) Phase Contrast microscopic pictures, showing apoptotic morphology of Huh-7 cells following treatment with either DMSO or TRAIL-TZD combination for 24 hours. (B) Huh-7 cells were treated with DMSO or 50 $\mu$ M TZD and 100ng/ml TRAIL either alone or in combination for the indicated amounts of time. At the end of incubation, cells were harvested and apoptosis assays were performed via DAPI staining. The data in each set represent the mean + s.d. of two independent experiments.

**Supplemental Figure S2: *Effect of increasing concentrations of TZD or TRAIL on Huh-7 cell apoptosis:*** (A & B) Huh-7 cells were treated with either DMSO or a combination of 100ng/ml TRAIL and increasing concentrations of TZD (A) and DMSO or a combination of 50 $\mu$ M TZD and increasing concentrations of TRAIL (B). At the end of incubation, cells were harvested and apoptosis assays were performed using cell death detection ELISA<sup>PLUS</sup> kit. The data in each set represent the mean + s.d. of two independent experiments.

**Supplemental Figure S3: *Effect of TRAIL-TZD combination on various cancer cell apoptosis:*** LNCaP (A) SKOV3 (B) and RKO (C) cells were treated with TZD and TRAIL either alone or in combination for 24 hours, following which apoptosis assays were performed via DAPI staining. The data in each set represent the mean  $\pm$  s.d. of two independent experiments.

**Supplemental Figure S4: *Effect of TRAIL-TZD combination on  $\beta$ -catenin downstream targets:*** (A) Huh-7 and (B) LNCaP cells were treated with TZD and TRAIL either alone or in combination for 24 hours, following which Western Blot analyses were performed with the antibodies indicated.

**Supplemental Figure S5: *Effect of  $\beta$ -catenin overexpression on TRAIL-induced apoptosis:*** RKO or RKO- $\beta$ -catenin cells were treated with either DMSO or TRAIL-TZD combination for 24 hours. At the end of incubation cells were harvested and apoptosis assays were performed via cell death detection ELISA<sup>PLUS</sup> kit. The data in each set represent the mean  $\pm$  s.d. of at least two independent experiments.

**A**

**DMSO**

**TZD+TRAIL**

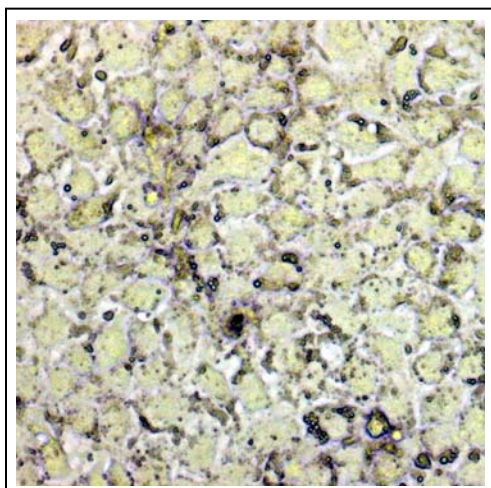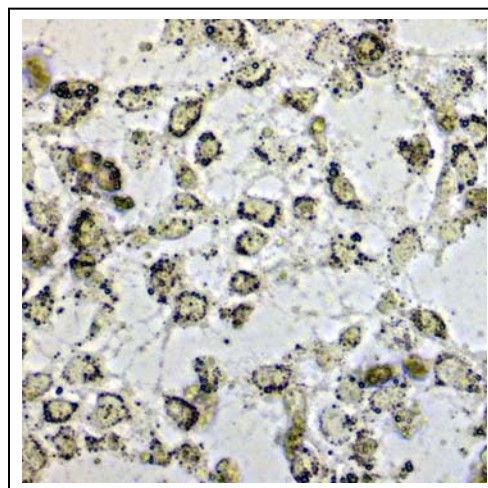

**B**

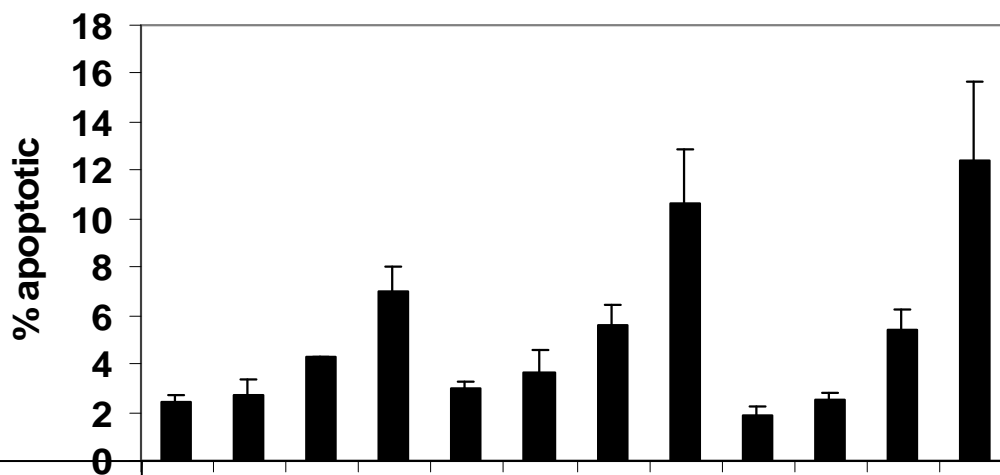

|                                  |                 |          |          |          |                 |          |          |          |                 |           |           |           |
|----------------------------------|-----------------|----------|----------|----------|-----------------|----------|----------|----------|-----------------|-----------|-----------|-----------|
| <b>Lane</b>                      | <b>1</b>        | <b>2</b> | <b>3</b> | <b>4</b> | <b>5</b>        | <b>6</b> | <b>7</b> | <b>8</b> | <b>9</b>        | <b>10</b> | <b>11</b> | <b>12</b> |
| <b>DMSO</b>                      | +               | -        | -        | -        | +               | -        | -        | -        | +               | -         | -         | -         |
| <b>TZD (50<math>\mu</math>M)</b> | -               | +        | -        | +        | -               | +        | -        | +        | -               | +         | -         | +         |
| <b>TRAIL (100ng/ml)</b>          | -               | -        | +        | +        | -               | -        | +        | +        | -               | -         | +         | +         |
| <b>Hours of treatment</b>        | <b>12 hours</b> |          |          |          | <b>24 hours</b> |          |          |          | <b>48 hours</b> |           |           |           |
| <b>Cell Type</b>                 | <b>Huh-7</b>    |          |          |          |                 |          |          |          |                 |           |           |           |

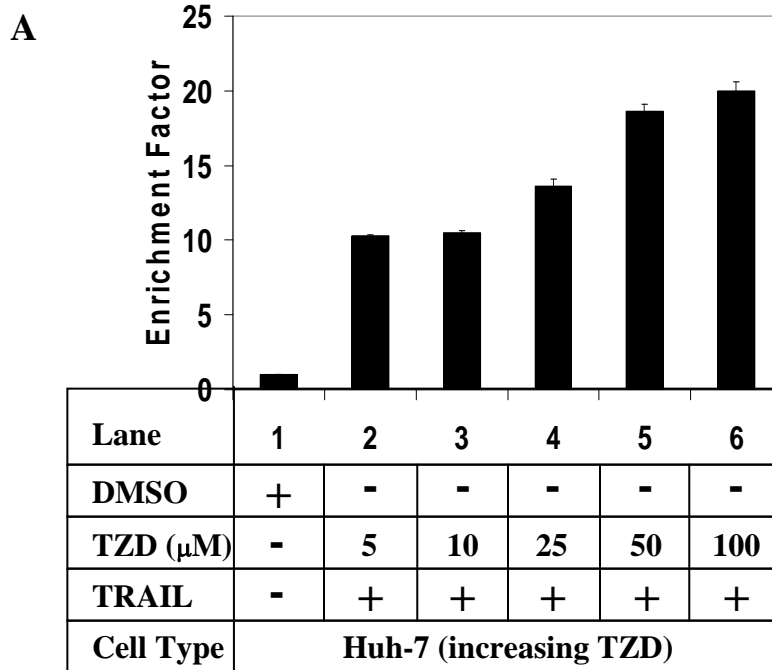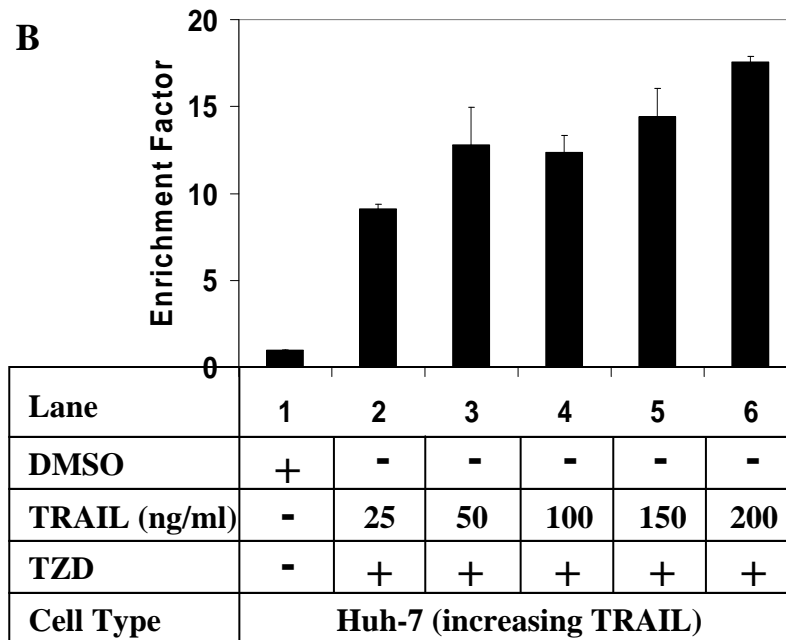

**Supplementary Fig S2: Senthivinayagam et al**

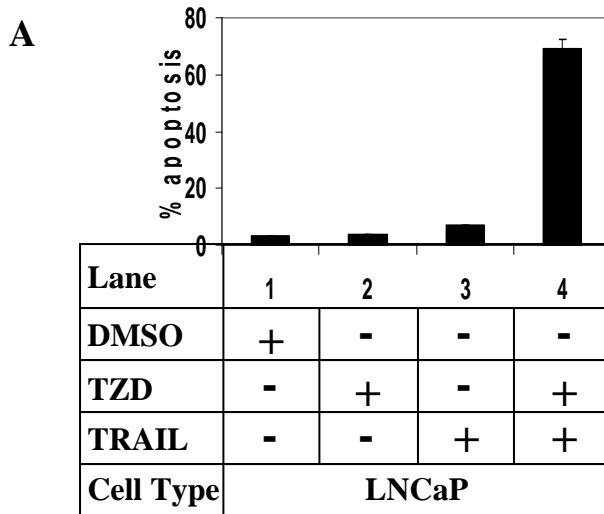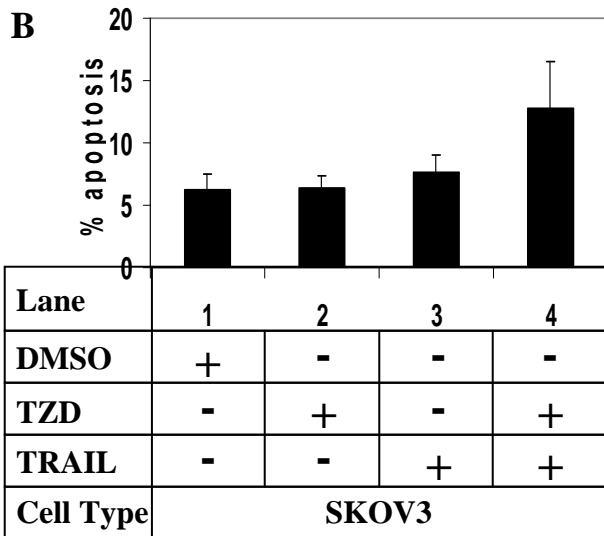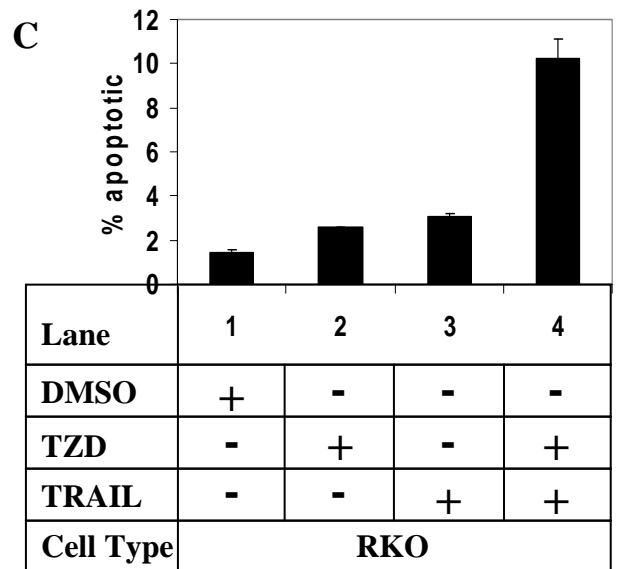

**A**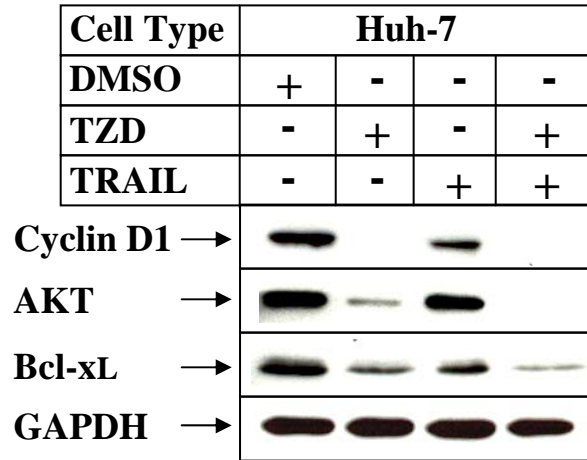**B**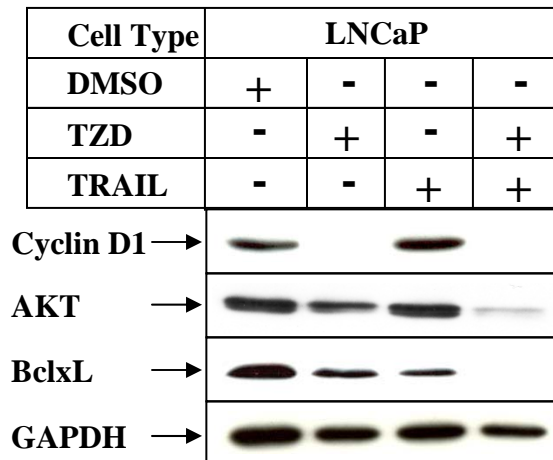

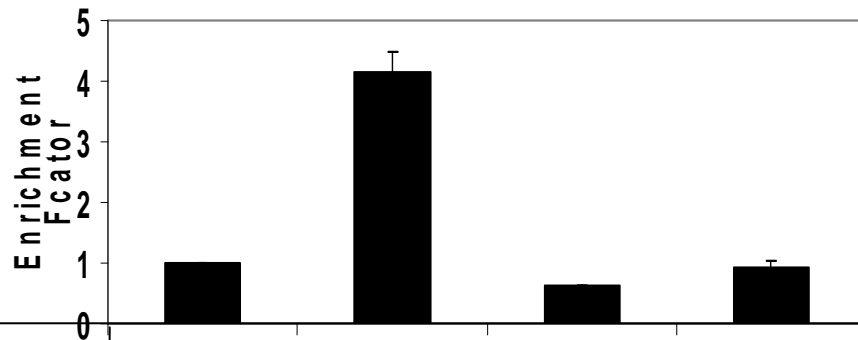

| Lane             | 1   | 2 | 3                     | 4 |
|------------------|-----|---|-----------------------|---|
| DMSO             | +   | - | +                     | - |
| TZD (50 $\mu$ M) | -   | + | -                     | + |
| TRAIL (100ng/ml) | -   | + | -                     | + |
| Cell Type        | RKO |   | RKO- $\beta$ -catenin |   |
